# Supplementary material
Source: MDPI journal article supplement (https://www.mdpi.com/2073-4441/15/20/3630)
Supplement: s1 [file s1]

**Supplementary material**  
**Table S1-Subsystems, indicators and data source**

| Subsystems                                           | Indicators                                                            | Data source                                                                                                                                                                                                   |
|------------------------------------------------------|-----------------------------------------------------------------------|---------------------------------------------------------------------------------------------------------------------------------------------------------------------------------------------------------------|
| Natural water subsystem                              | Average annual rainfall                                               | Hunan Water Resources Bulletin<br>( <a href="http://slt.hunan.gov.cn/slt/xxgk/tjgb/index.html">http://slt.hunan.gov.cn/slt/xxgk/tjgb/index.html</a> )                                                         |
|                                                      | Water resource per capita                                             | Hunan Statistical Yearbook<br>( <a href="http://tjj.hunan.gov.cn/hntj/tjsj/tjnj/index.html">http://tjj.hunan.gov.cn/hntj/tjsj/tjnj/index.html</a> )                                                           |
|                                                      | Total water resource                                                  | Hunan Water Resources Bulletin<br>( <a href="http://slt.hunan.gov.cn/slt/xxgk/tjgb/index.html">http://slt.hunan.gov.cn/slt/xxgk/tjgb/index.html</a> )                                                         |
| Water Conservancy Facilities Subsystem               | Water conservancy construction investment in agriculture and forestry | China Water Resources Statistics Yearbook<br>( <a href="http://www.stats.gov.cn/tjsj/ndsj/">http://www.stats.gov.cn/tjsj/ndsj/</a> )                                                                          |
|                                                      | Number of reservoir                                                   | China Water Resources Statistics Yearbook<br>( <a href="http://www.stats.gov.cn/tjsj/ndsj/">http://www.stats.gov.cn/tjsj/ndsj/</a> )                                                                          |
|                                                      | Reservoir storage capacity                                            | Hunan Water Resources Bulletin<br>( <a href="http://slt.hunan.gov.cn/slt/xxgk/tjgb/index.html">http://slt.hunan.gov.cn/slt/xxgk/tjgb/index.html</a> )                                                         |
|                                                      | Length of embankments                                                 | China Water Resources Statistics Yearbook<br>( <a href="http://www.stats.gov.cn/tjsj/ndsj/">http://www.stats.gov.cn/tjsj/ndsj/</a> )                                                                          |
|                                                      | Effective irrigated area of farmland                                  | Hunan Statistical Yearbook<br>( <a href="http://tjj.hunan.gov.cn/hntj/tjsj/tjnj/index.html">http://tjj.hunan.gov.cn/hntj/tjsj/tjnj/index.html</a> )                                                           |
|                                                      | Water consumption (GDP)                                               | Hunan Water Resources Bulletin<br>( <a href="http://slt.hunan.gov.cn/slt/xxgk/tjgb/index.html">http://slt.hunan.gov.cn/slt/xxgk/tjgb/index.html</a> )                                                         |
|                                                      | Industrial added value water                                          | Hunan Water Resources Bulletin<br>( <a href="http://slt.hunan.gov.cn/slt/xxgk/tjgb/index.html">http://slt.hunan.gov.cn/slt/xxgk/tjgb/index.html</a> )                                                         |
| Water resource development and utilization subsystem | Water consumption per unit of grain yield                             | Hunan Statistical Yearbook<br>( <a href="http://tjj.hunan.gov.cn/hntj/tjsj/tjnj/index.html">http://tjj.hunan.gov.cn/hntj/tjsj/tjnj/index.html</a> )                                                           |
|                                                      | Comprehensive water consumption per capita                            | Hunan Statistical Yearbook<br>( <a href="http://tjj.hunan.gov.cn/hntj/tjsj/tjnj/index.html">http://tjj.hunan.gov.cn/hntj/tjsj/tjnj/index.html</a> )                                                           |
|                                                      | Total water supply                                                    | Hunan Statistical Yearbook<br>( <a href="http://tjj.hunan.gov.cn/hntj/tjsj/tjnj/index.html">http://tjj.hunan.gov.cn/hntj/tjsj/tjnj/index.html</a> )                                                           |
|                                                      | Water utilization rate                                                | Hunan Ecological Environment Status Bulletin<br>( <a href="http://sthjt.hunan.gov.cn/sthjt/xxgk/zdly/hjjc/hjtj/index.html">http://sthjt.hunan.gov.cn/sthjt/xxgk/zdly/hjjc/hjtj/index.html</a> )               |
|                                                      | Green coverage area                                                   | Hunan Statistical Yearbook<br>( <a href="http://tjj.hunan.gov.cn/hntj/tjsj/tjnj/index.html">http://tjj.hunan.gov.cn/hntj/tjsj/tjnj/index.html</a> )                                                           |
|                                                      | Sewage discharge                                                      | Hunan Statistical Yearbook<br>( <a href="http://tjj.hunan.gov.cn/hntj/tjsj/tjnj/index.html">http://tjj.hunan.gov.cn/hntj/tjsj/tjnj/index.html</a> )                                                           |
|                                                      | Sewage treatment rate                                                 | Hunan Statistical Yearbook<br>( <a href="http://tjj.hunan.gov.cn/hntj/tjsj/tjnj/index.html">http://tjj.hunan.gov.cn/hntj/tjsj/tjnj/index.html</a> )                                                           |
| Ecological Environment subsystem                     | Water quality compliance rate                                         | Hunan Statistical Yearbook<br>( <a href="http://tjj.hunan.gov.cn/hntj/tjsj/tjnj/index.html">http://tjj.hunan.gov.cn/hntj/tjsj/tjnj/index.html</a> )                                                           |
|                                                      | Food production                                                       | Hunan Statistical Yearbook<br>( <a href="http://tjj.hunan.gov.cn/hntj/tjsj/tjnj/index.html">http://tjj.hunan.gov.cn/hntj/tjsj/tjnj/index.html</a> )                                                           |
|                                                      | Per capita disposable income                                          | Hunan Statistical Yearbook<br>( <a href="http://tjj.hunan.gov.cn/hntj/tjsj/tjnj/index.html">http://tjj.hunan.gov.cn/hntj/tjsj/tjnj/index.html</a> )                                                           |
|                                                      | Gross regional product                                                | Statistical Bulletin of National Economic and Social Development of Hunan Province<br>( <a href="http://www.hunan.gov.cn/hnszf/zfsj/tjgb/202003/t20">http://www.hunan.gov.cn/hnszf/zfsj/tjgb/202003/t20</a> ) |

200319\_11815838.html)

Regional fiscal revenue

Statistical Bulletin of National Economic and Social  
Development of Hunan Province  
([http://www.hunan.gov.cn/hnszf/zfsj/tjgb/202003/t20200319\\_11815838.html](http://www.hunan.gov.cn/hnszf/zfsj/tjgb/202003/t20200319_11815838.html))

---

**Table S2-Order parameter index**

| <b>Order parameter index</b>                              | <b>2000</b> | <b>2003</b> | <b>2006</b> | <b>2009</b> | <b>2012</b> | <b>2015</b> | <b>2018</b> | <b>2019</b> | <b>Mean</b> | <b>SD</b> |
|-----------------------------------------------------------|-------------|-------------|-------------|-------------|-------------|-------------|-------------|-------------|-------------|-----------|
| Average annual rainfall                                   | 0.473       | 0.160       | 0.413       | 0.252       | 0.725       | 0.662       | 0.299       | 0.571       | 0.444       | 0.188     |
| Water resources per capita                                | 0.490       | 0.377       | 0.518       | 0.136       | 0.615       | 0.552       | 0.055       | 0.623       | 0.421       | 0.202     |
| Total water resources                                     | 0.454       | 0.376       | 0.527       | 0.163       | 0.624       | 0.599       | 0.102       | 0.680       | 0.441       | 0.200     |
| Investment in agriculture, forestry and water conservancy | 0.012       | 0.093       | 0.325       | 0.194       | 0.392       | 0.715       | 0.909       | 0.990       | 0.454       | 0.349     |
| Reservoir seat number                                     | 0.719       | 0.729       | 0.739       | 0.740       | 0.958       | 0.961       | 0.962       | 0.939       | 0.843       | 0.112     |
| Year-end storage capacity                                 | 0.646       | 0.650       | 0.689       | 0.691       | 0.988       | 0.072       | 0.195       | 0.290       | 0.528       | 0.289     |
| Length of embankments                                     | 0.003       | 0.026       | 0.031       | 0.053       | 0.068       | 0.926       | 0.974       | 0.987       | 0.383       | 0.449     |
| Effective irrigated area of farmland                      | 0.056       | 0.054       | 0.085       | 0.163       | 0.759       | 0.820       | 0.932       | 0.946       | 0.477       | 0.392     |
| Water for ten thousand yuan OF GDP                        | 0.069       | 0.207       | 0.521       | 0.775       | 0.916       | 0.964       | 0.979       | 0.999       | 0.678       | 0.346     |
| Ten thousand yuan of industrial added value water         | 0.463       | 0.233       | 0.547       | 0.746       | 0.908       | 0.960       | 0.999       | 0.980       | 0.729       | 0.267     |
| Water per unit of grain yield                             | 0.186       | 0.038       | 0.717       | 0.812       | 0.979       | 0.895       | 0.759       | 0.752       | 0.642       | 0.318     |
| Comprehensive water consumption per capita                | 0.165       | 0.449       | 0.511       | 0.703       | 0.594       | 0.631       | 0.691       | 0.826       | 0.571       | 0.189     |
| The total water supply                                    | 0.220       | 0.135       | 0.415       | 0.400       | 0.432       | 0.707       | 0.858       | 0.687       | 0.482       | 0.234     |
| Water utilization ratio                                   | 0.242       | 0.361       | 0.275       | 0.652       | 0.203       | 0.276       | 0.724       | 0.268       | 0.375       | 0.186     |
| Green coverage area                                       | 0.606       | 0.061       | 0.055       | 0.274       | 0.423       | 0.607       | 0.943       | 0.982       | 0.494       | 0.335     |
| Sewage discharge                                          | 0.381       | 0.997       | 0.443       | 0.521       | 0.461       | 0.388       | 0.134       | 0.013       | 0.417       | 0.273     |
| Sewage treatment rate                                     | 0.105       | 0.086       | 0.176       | 0.478       | 0.771       | 0.909       | 0.976       | 0.986       | 0.561       | 0.372     |
| Water quality standard rate of water functional area      | 0.632       | 0.811       | 0.876       | 0.578       | 0.744       | 0.051       | 0.797       | 0.921       | 0.676       | 0.260     |
| Food production                                           | 0.505       | 0.037       | 0.842       | 0.890       | 0.864       | 0.954       | 0.641       | 0.602       | 0.667       | 0.280     |
| Per capita disposable income                              | 0.002       | 0.037       | 0.107       | 0.238       | 0.444       | 0.629       | 0.892       | 0.989       | 0.417       | 0.361     |
| Gross regional product                                    | 0.154       | 0.204       | 0.290       | 0.624       | 0.545       | 0.722       | 0.916       | 0.990       | 0.556       | 0.297     |
| Regional revenue                                          | 0.001       | 0.028       | 0.072       | 0.408       | 0.554       | 0.826       | 0.933       | 0.990       | 0.476       | 0.386     |

**Table S3.** Xiangjiang River Basin WCS system coordinated governance index information

| <i>i</i>              | Subsystem                                             | <i>j</i> Order parameter index                                                                                | Upper and lower limits | Information entropy value | entropy coefficient | property           |
|-----------------------|-------------------------------------------------------|---------------------------------------------------------------------------------------------------------------|------------------------|---------------------------|---------------------|--------------------|
| <i>i</i> <sub>1</sub> | Natural water subsystem                               | <i>j</i> <sub>1</sub> mean annual precipitation/ <i>mm</i>                                                    | [999.40,1 892.80]      | 0.955                     | 0.269               | Positive direction |
|                       |                                                       | <i>j</i> <sub>2</sub> per capita water resources/( <i>m</i> <sup>3</sup> /人)                                  | [1 375.26,3 244.89]    | 0.936                     | 0.383               | Positive direction |
|                       |                                                       | <i>j</i> <sub>3</sub> total water resources/ <i>a hundred million m</i> <sup>3</sup>                          | [70.23,167.66]         | 0.942                     | 0.348               | Positive direction |
|                       |                                                       | <i>j</i> <sub>4</sub> Investment in agriculture, forestry and water conservancy/ten thousand yuan             | [16 832.81,669 461.67] | 0.900                     | 0.165               | Positive direction |
| <i>i</i> <sub>2</sub> | water conservancy facilities subsystem                | <i>j</i> <sub>5</sub> Reservoir seat number/individual entries                                                | [837,1 129]            | 0.967                     | 0.053               | Positive direction |
|                       |                                                       | <i>j</i> <sub>6</sub> Year-end storage capacity/ten thousand <i>m</i> <sup>3</sup>                            | [37 620.00,191 458.97] | 0.930                     | 0.114               | Positive direction |
|                       |                                                       | <i>j</i> <sub>7</sub> Length of embankments/ <i>km</i>                                                        | [409.74,1 650.25]      | 0.744                     | 0.420               | Positive direction |
|                       |                                                       | <i>j</i> <sub>8</sub> Effective irrigated area of farmland/ten thousand <i>hm</i> <sup>2</sup>                | [200.17,244.71]        | 0.850                     | 0.247               | Positive direction |
| <i>i</i> <sub>3</sub> | Water resources development and utilization subsystem | <i>j</i> <sub>9</sub> ten thousand-yuan GDP water utilization/ <i>m</i> <sup>3</sup>                          | [87.30,818.94]         | 0.942                     | 0.218               | Negative direction |
|                       |                                                       | <i>j</i> <sub>10</sub> Ten thousand yuan of industrial added value water/ <i>m</i> <sup>3</sup>               | [59.38,473.02]         | 0.963                     | 0.140               | Negative direction |
|                       |                                                       | <i>j</i> <sub>11</sub> Ten thousand yuan of industrial added value water ( <i>m</i> <sup>3</sup> / <i>t</i> ) | [587.91,877.14]        | 0.946                     | 0.204               | Negative direction |
|                       |                                                       | <i>j</i> <sub>12</sub> per capita water use / <i>m</i> <sup>3</sup>                                           | [529.43,589.17]        | 0.973                     | 0.102               | Negative direction |
|                       |                                                       | <i>j</i> <sub>13</sub> total supply of water/hundred million <i>m</i> <sup>3</sup>                            | [27.41,29.47]          | 0.975                     | 0.095               | Positive direction |
|                       |                                                       | <i>j</i> <sub>14</sub> utilization rate of water resources /%                                                 | [20.81,46.65]          | 0.936                     | 0.242               | Positive direction |
|                       |                                                       | <i>j</i> <sub>15</sub> Green coverage area/ <i>hm</i> <sup>2</sup>                                            | [3 268.18,7 477.37]    | 0.896                     | 0.390               | Positive direction |
|                       |                                                       | <i>j</i> <sub>16</sub> quantity of waste water effluent/ten thousand <i>m</i> <sup>3</sup>                    | [5 896.52,25 203.54]   | 0.963                     | 0.140               | Negative direction |
| <i>i</i> <sub>4</sub> | Ecological environment subsystem                      | <i>j</i> <sub>17</sub> treatment rate of domestic sewage/%                                                    | [29.22,98.55]          | 0.897                     | 0.384               | Positive direction |
|                       |                                                       | <i>j</i> <sub>18</sub> Water quality standard                                                                 | [83.43,97.60]          | 0.977                     | 0.085               | Positive direction |

|                                   |                                                               |                                |       |       |                       |
|-----------------------------------|---------------------------------------------------------------|--------------------------------|-------|-------|-----------------------|
|                                   | rate of water functional<br>area/%                            |                                |       |       |                       |
|                                   | $j_{19}$ grain output/t                                       | [2 075 842.40,2<br>642 947.46] | 0.967 | 0.085 | Positive<br>direction |
| $i_5$ Socio-economic<br>subsystem | $j_{20}$ per capita disposable<br>income/yuan                 | [4 466.60,32<br>969.26]        | 0.863 | 0.360 | Positive<br>direction |
|                                   | $j_{21}$ gross regional domestic<br>product/ten thousand yuan | [1 198.53,22 936<br>432.56]    | 0.936 | 0.167 | Positive<br>direction |
|                                   | $j_{22}$ Regional revenue/ten<br>thousand yuan                | [144 191.19,2 882<br>472.67]   | 0.852 | 0.388 | Positive<br>direction |
